# Supplementary material
Source: publisher figshare collection journal article supplement (https://frontiersin.figshare.com/ndownloader/files/31530314)
Supplement: Supplementary file 1 [file 31530314]

**Supplementary Figures**

**Supplementary Figure 1 |** Analytical analyses for neonicotinoid residues in pesticide-free honey bee (Apis mellifera) corbicular pollen used to form experimental pollen patties. Reports include the Limit Of Detection (LOD) by the ultra-high-performance liquid chromatography-tandem mass spectrometry used to test for neonicotinoid residues, as well as the detected concentration in the corbicular pollen (Result). Neonicotinoid concentrations are reported in Parts Per Billion (PPB).

**Supplementary Figure 2 |** Analytical analyses for neonicotinoid residues in experimental pollen patties administered to experimental honey bee (Apis mellifera) colonies. Reports include the Limit Of Detection (LOD) by the ultra-high-performance liquid chromatography-tandem mass spectrometry used to test for neonicotinoid residues, as well as the detected concentration in the pollen patties (Result). Neonicotinoid concentrations are reported in Parts Per Billion (PPB).
